# Supplementary material
Source: PubMed Central journal article supplement (PMC4787664)
Supplement: wint804930.ww1_default.pdf [file wint804930.ww1_default.pdf]

Tables of data for figure

Bone density of hip

| Study                                                                                | Experimental |      |            | Control |     |            | Weight (%) | SMD [ 95% CI]              |
|--------------------------------------------------------------------------------------|--------------|------|------------|---------|-----|------------|------------|----------------------------|
|                                                                                      | Mean         | SD   | Total      | Mean    | SD  | Total      |            |                            |
| Cheng 2005                                                                           | 14.2         | 1    | 46         | 14.5    | 1   | 41         | 19.2       | -0.30 [-0.72 to 0.13]      |
| El Hajj Fuleihan (M) 2006                                                            | 3.97         | 4.51 | 116        | 4.3     | 4.6 | 56         | 26.1       | -0.07 [-0.39 to 0.25]      |
| El Hajj Fuleihan (F) 2006                                                            | 4.35         | 4.59 | 113        | 3.2     | 4.3 | 55         | 25.8       | 0.25[-0.07 to 0.58]        |
| Viljakainen 2006                                                                     | 8.19         | 6.5  | 139        | 6.71    | 6.4 | 73         | 28.9       | 0.23[-0.06 to 0.51]        |
| <b>Total (95% CI)</b>                                                                |              |      | <b>414</b> |         |     | <b>225</b> | <b>100</b> | <b>0.06[-0.18 to 0.29]</b> |
| Heterogeneity: $\tau^2 = 0.03$ ; $\chi^2 = 6.09$ , $df=3$ ( $P=0.11$ ); $I^2 = 51\%$ |              |      |            |         |     |            |            |                            |
| Test for overall effect: $Z=0.46$ ( $P=0.64$ )                                       |              |      |            |         |     |            |            |                            |

Bone density of lumbar spine

| Study                                                            | Experimental |       |            | Control |      |            | Weight (%) | SMD [ 95% CI]            |
|------------------------------------------------------------------|--------------|-------|------------|---------|------|------------|------------|--------------------------|
|                                                                  | Mean         | SD    | Total      | Mean    | SD   | Total      |            |                          |
| Andersen 2008                                                    | 13.15        | 10.86 | 14         | 9.6     | 7.5  | 7          | 3.1        | 0.34[-0.57 to 1.26]      |
| Cheng 2005                                                       | 19.2         | 1     | 46         | 19.4    | 1.1  | 41         | 14.6       | -0.19[-0.61 to 0.23]     |
| El Hajj Fuleihan (M) 2006                                        | 9.69         | 6.73  | 116        | 9.6     | 6.7  | 56         | 25.5       | 0.01[-0.31 to 0.33]      |
| El Hajj Fuleihan (F) 2006                                        | 8.56         | 7.38  | 113        | 6.5     | 5.2  | 55         | 24.7       | 0.30[-0.02 to 0.63]      |
| Viljakainen 2006                                                 | 11.61        | 6.19  | 139        | 9.71    | 7.76 | 73         | 32.1       | 0.28[-0.00, 0.56]        |
| <b>Total (95% CI)</b>                                            |              |       | <b>428</b> |         |      | <b>232</b> | <b>100</b> | <b>0.15[-0.01, 0.31]</b> |
| Heterogeneity: $\chi^2 = 5.02$ $df=4$ ( $P=0.28$ ); $I^2 = 20\%$ |              |       |            |         |      |            |            |                          |
| Test for overall effect: $Z= 1.84$ ( $P=0.07$ )                  |              |       |            |         |      |            |            |                          |

Total body bone mineral content

| Study                                                                          | Experimental |      |            | Control |      |            | Weight (%) | SMD [ 95% CI]            |
|--------------------------------------------------------------------------------|--------------|------|------------|---------|------|------------|------------|--------------------------|
|                                                                                | Mean         | SD   | Total      | Mean    | SD   | Total      |            |                          |
| Andersen 2008                                                                  | 15.4         | 12   | 14         | 12.7    | 7.6  | 7          | 3.0        | 0.24[-0.67 to 1.15]      |
| Cheng 2005                                                                     | 34.7         | 1.3  | 46         | 35      | 1.4  | 41         | 13.8       | -0.22[-0.64 to 0.20]     |
| Du 2004                                                                        | 39.7         | 8.5  | 113        | 38.4    | 8.43 | 111        | 35.7       | 0.15[-0.11 to 0.42]      |
| El Hajj Fuleihan (M) 2006                                                      | 15.88        | 8.42 | 116        | 15.8    | 8.4  | 56         | 24.1       | 0.01[-0.31 to 0.33]      |
| El Hajj Fuleihan (F) 2006                                                      | 11.64        | 10.8 | 113        | 8.7     | 8.8  | 55         | 23.4       | 0.29[-0.04 to 0.61]      |
| <b>Total (95% CI)</b>                                                          |              |      | <b>402</b> |         |      | <b>270</b> | <b>100</b> | <b>0.10[-0.06, 0.26]</b> |
| Heterogeneity: $\text{Chi}^2 = 4.05$ , $\text{df}=4$ ( $P=0.40$ ); $I^2 = 1\%$ |              |      |            |         |      |            |            |                          |
| Test for overall effect: $Z=1.26$ ( $P=0.21$ )                                 |              |      |            |         |      |            |            |                          |

Bone density of forearm

| Study                                                                                                   | Experimental |      |            | Control |     |            | Weight (%) | SMD [ 95% CI]               |
|---------------------------------------------------------------------------------------------------------|--------------|------|------------|---------|-----|------------|------------|-----------------------------|
|                                                                                                         | Mean         | SD   | Total      | Mean    | SD  | Total      |            |                             |
| Cheng                                                                                                   | 3.35         | 1.4  | 46         | 2.61    | 1.5 | 41         | 29.9       | 0.51[0.08 to 0.93]          |
| El Hajj Fuleihan (M) 2006                                                                               | 3            | 3.3  | 116        | 3.9     | 4.2 | 56         | 35.1       | -0.25 [-0.57 to 0.07]       |
| El Hajj Fuleihan (F) 2006                                                                               | 3.48         | 3.89 | 113        | 3.7     | 2.7 | 55         | 35.0       | -0.06[-0.38 to 0.26]        |
| <b>Total (95% CI)</b>                                                                                   |              |      | <b>275</b> |         |     | <b>152</b> | <b>100</b> | <b>0.04 [-0.36 to 0.45]</b> |
| Heterogeneity: $\text{Tau}^2 = 0.09$ ; $\text{Chi}^2 = 7.82$ , $\text{df}=2$ ( $P=0.02$ ); $I^2 = 74\%$ |              |      |            |         |     |            |            |                             |
| Test for overall effect: $Z=0.21$ ( $P=0.84$ )                                                          |              |      |            |         |     |            |            |                             |
